# Supplementary material for: Is the association of QTc with atrial fibrillation and stroke in cohort studies a matter of time?
Source: HighWire-hosted journal article supplement (doi:10.1136/openhrt-2022-002080), 2022-09-01
Supplement: openhrt-2022-002080supp001_data_supplement.pdf [file openhrt-2022-002080supp001_data_supplement.pdf]

## **SUPPLEMENTAL MATERIAL**

### **Is the association of QTc with atrial fibrillation and stroke in cohort studies**

#### **a matter of time?**

Navid Radnahad <sup>1</sup>, Hanne Ehrlinder <sup>1</sup>, Karin Leander <sup>2</sup>, Johan Engdahl <sup>1</sup>, Håkan Wallén <sup>1</sup>,  
Bruna Gigante <sup>1,3</sup>

1 Dept of Clinical Science Danderyd University Hospital, Stockholm, Sweden

2 Unit of Cardiovascular and Nutritional Epidemiology, Institute of Environmental Medicine, Karolinska Institutet, Stockholm

3 Division of Cardiovascular Medicine, Dept of Medicine, Karolinska Institutet, Stockholm Sweden

#### **Index**

#### **Supplemental Figure I**

#### **Supplemental Table I**

#### **Supplemental Table II**

#### **Supplemental Table III**

#### **Supplemental Table IV**

**Supplemental Figure I.** Flowchart of the inclusion and exclusion of participants from the 60YO (Panel A) and Carebbean-e (Panel B)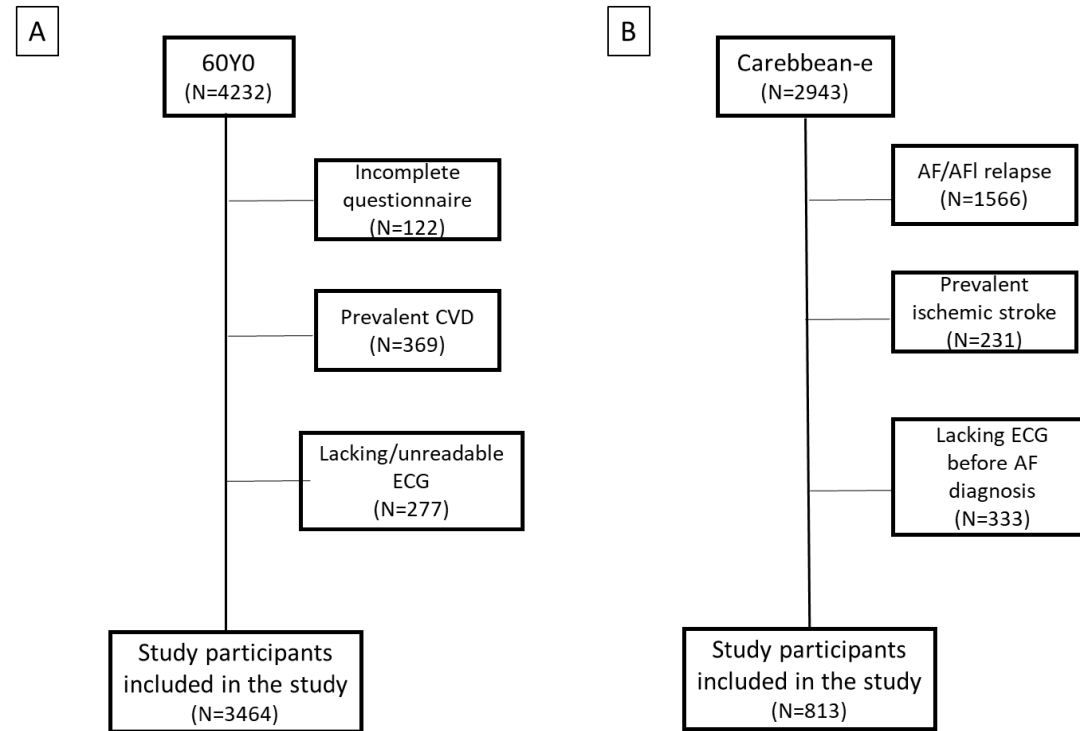

Abbreviations: CVD: cardiovascular disease including myocardial infarction, ischemic stroke and atrial fibrillation/flutter; AF: atrial fibrillation; AFL: atrial flutter; ECG: electrocardiogram

**Supplemental Table I.** Risk of ischemic stroke, atrial fibrillation and atrial fibrillation and ischemic stroke associated with increasing QTc interval length (ms) in the 60YO.

| <b>Atrial Fibrillation</b>                         | <b>Non Cases/Cases</b> | <b>HR (95% CI)</b> | <b>P value</b> |
|----------------------------------------------------|------------------------|--------------------|----------------|
| <b>Crude</b>                                       | 3029/435               | 1.01 (1.00-1.01)   | <0.0001        |
| <b>Model 1</b>                                     | 2946/425               | 1.01 (1.00-1.01)   | <0.0001        |
| <b>Model 2</b>                                     | 2907/421               | 1.01 (1.00-1.01)   | <0.0001        |
| <b>Ischemic stroke</b>                             |                        |                    |                |
| <b>Crude</b>                                       | 3317/147               | 1.00 (0.99-1.01)   | 0.34           |
| <b>Model 1</b>                                     | 3228/143               | 1.00 (0.99-1.01)   | 0.33           |
| <b>Model 2</b>                                     | 3185/143               | 1.00 (0.99-1.01)   | 0.37           |
| <b>Atrial fibrillation<br/>and ischemic stroke</b> |                        |                    |                |
| <b>Crude</b>                                       | 3409/55                | 1.00 (0.99-1.02)   | 0.06           |
| <b>Model 1</b>                                     | 3318/53                | 1.00 (0.99-1.02)   | 0.06           |
| <b>Model 2</b>                                     | 3276/52                | 1.01 (1.00-1.02)   | 0.04           |

Model 1: adjusted for sex, hypertension, left ventricular hypertrophy and QRS length.

Model 2: model 1+ diabetes, smoking, BMI, alcohol consumption and hyperlipidemia.

**Supplemental Table II.** Clinical characteristics of the Carebbean-e study participants included in the present study

|                                                | <b>Carebbean-e (n=813)</b> |
|------------------------------------------------|----------------------------|
| <b>Age (y)</b>                                 | 83 (79-88)                 |
| <b>Male/Female</b>                             | 297/516                    |
| <b>BMI (kg/m<sup>2</sup>)</b>                  | 25 (22-28)                 |
| <b>Risk factors, n (%)</b>                     |                            |
| <b>Hypertension</b>                            | 571 (70)                   |
| <b>Diabetes</b>                                | 119 (15)                   |
| <b>Oral anticoagulant treatment, n (%)</b>     | 599 (73)                   |
| <b>ECG parameters</b>                          |                            |
| <b>Heart rate, bpm</b>                         | 71 (62-81)                 |
| <b>PQ, ms</b>                                  | 166 (148-188)              |
| <b>QRS, ms</b>                                 | 90 (82-100)                |
| <b>QTc, ms</b>                                 | 433 (414-453)              |
| <b>Time from ECG in SR to AF diagnosis (y)</b> | 2.16 (5- 0.69)             |

Continuous data are reported as median and interquartile range. Missing values: BMI, n=7

**Supplemental Table III.** Association of the QTc duration as a continuous variable and categorized into quartiles with the risk of ischemic stroke in the Carebbean-e study

|                 | <b>Non cases/<br/>Cases</b> | <b>Crude<br/>HR (95% CI)</b> | <b>Model 1<br/>HR (95% CI)</b> | <b>Model 2<br/>HR (95% CI)</b> |
|-----------------|-----------------------------|------------------------------|--------------------------------|--------------------------------|
| <b>QTc (ms)</b> | 727/86                      | 1.00 (0.99-1.01)             | 1.00 (0.99-1.01)               | 1.00 (0.99-1.01)               |
| <b>Q1</b>       | 181/22                      | Ref                          | Ref                            | Ref                            |
| <b>Q2</b>       | 181/20                      | 1.04 (0.57-1.91)             | 1.00 (0.54-1.84)               | 1.00 (0.54-1.86)               |
| <b>Q3</b>       | 183/20                      | 1.14 (0.62-2.11)             | 0.98 (0.52-1.84)               | 1.01 (0.53-1.93)               |
| <b>Q4</b>       | 182/24                      | 1.43 (0.82-2.57)             | 1.34 (0.74-2.40)               | 1.35 (0.69-2.62)               |

QTc quartiles boundaries (ms): Q1<414; Q2≥414, <433; Q3≥433, <453; Q4≥453

**Supplemental Table IV.** QTc duration according to time from ECG registration showing sinus rhythm (ECG-SR)

to the time when a diagnostic ECG for AF (ECG-AF) was recorded categorized in quartiles (Q) in study participants from the Carebbean-e study

| <b>Time interval between the ECG in sinus rhythm and the AF diagnostic ECG</b> |                             | <b>Carebbean-e (n=813)</b> |                 | <b>Incident ischemic stroke (n=86)</b> |                 | <b>Non cases (n=727)</b> |                 |
|--------------------------------------------------------------------------------|-----------------------------|----------------------------|-----------------|----------------------------------------|-----------------|--------------------------|-----------------|
| <b>Quartile</b>                                                                | <b>Quartile borders (y)</b> | <b>N</b>                   | <b>QTc (ms)</b> | <b>N</b>                               | <b>QTc (ms)</b> | <b>N</b>                 | <b>QTc (ms)</b> |
| <b>Q4</b>                                                                      | > 5.07                      | 203                        | 421 (402-436)   | 17                                     | 425 (404-442)   | 186                      | 420 (402-435)   |
| <b>Q3</b>                                                                      | ≤5.07->2.16                 | 203                        | 433 (415-452)   | 26                                     | 432 (424-44)    | 177                      | 434 (415-452)   |
| <b>Q2</b>                                                                      | <2.16- >0.69                | 205                        | 440 (420-462)   | 21                                     | 439 (420-460)   | 184                      | 440 (420-464)   |
| <b>Q1</b>                                                                      | <0.69                       | 202                        | 440 (418-459)   | 22                                     | 441 (412-466)   | 180                      | 440 (418-457)   |
